# Supplementary material
Source: HighWire-hosted journal article supplement (https://bmjopen.bmj.com/content/11/7/e046819)
Supplement: inline-supplementary-material-1 [file inline-supplementary-material-1.pdf]

**Supplement 1**

Data collection form

Section 1: Demography, diagnosis, neoadjuvant treatment

|                                                                |  |
|----------------------------------------------------------------|--|
| Demographic data and previous therapies                        |  |
| Name/identifier                                                |  |
| Centre                                                         |  |
| Country                                                        |  |
| Age                                                            |  |
| Sex                                                            |  |
| Primary tumor site                                             |  |
| For colorectal cancer-exact site of the primary                |  |
| For ovarian cancer- exact site (ovaries, FT, peritoneum)       |  |
| Timing of PM (synchronous/metachronous)                        |  |
| Date of diagnosis of the primary                               |  |
| Date of diagnosis of PM                                        |  |
| TNM stage at diagnosis                                         |  |
| FIGO stage at diagnosis (for ovarian cancer)                   |  |
| Prior CRS                                                      |  |
| Date of prior CRS                                              |  |
| Prior CRS+HIPEC                                                |  |
| Date of prior CRS+HIPEC                                        |  |
| Prior surgery (not CRS)                                        |  |
| Prior surgical score                                           |  |
| Previous chemotherapy                                          |  |
| Number of lines of previous chemotherapy                       |  |
| Histological and molecular features                            |  |
| Histological diagnosis                                         |  |
| Tumor grade (high/low)                                         |  |
| Tumor differentiation (well, moderate, poor, undifferentiated) |  |
| Immunohistochemistry, if relevant (positive markers)           |  |
| Immunohistochemistry, if relevant (negative markers)           |  |
| BRCA (mutated/wt/not evaluated)                                |  |
| KRAS (mutated/wt/not evaluated)                                |  |
| BRAF (mutated/wt/not evaluated)                                |  |
| NRAS (mutated/wt/not evaluated)                                |  |
| BAP-1 (mutated/wt/not evaluated)                               |  |
| EGFR (mutated/wt/not evaluated)                                |  |
| Ki-67 (mention exact value in percentage)                      |  |

|                                           |  |
|-------------------------------------------|--|
| Any other marker (name)                   |  |
| Mutation status                           |  |
| Any other marker (name)                   |  |
| Mutation status                           |  |
| Neoadjuvant therapies                     |  |
| Neoadjuvant chemotherapy                  |  |
| Intravenous/oral                          |  |
| Regimen                                   |  |
| Number of cycles                          |  |
| Date of starting                          |  |
| Date of completion                        |  |
| Neoadjuvant PIPAC                         |  |
| Regimen                                   |  |
| Number of applications                    |  |
| Date of start                             |  |
| Date of completion                        |  |
| Neoadjuvant port directed IP chemotherapy |  |
| Regimen                                   |  |
| Number of cycles                          |  |
| Date of start                             |  |
| Date of completion                        |  |
| Neoadjuvant HIPEC                         |  |
| Regimen                                   |  |
| Number of cycles                          |  |

## Section 2 Radiology

|                                   |  |
|-----------------------------------|--|
| Peritoneal MRI                    |  |
| CT scan with oral and IV contrast |  |
| CT scan with IV contrast          |  |
| PET CT scan                       |  |
| Any other (please specify)        |  |
| Radiological PCI                  |  |
| Region 0                          |  |
| Morphological description         |  |
| Region 1                          |  |
| Morphological description         |  |
| Region 2                          |  |
| Morphological description         |  |
| Region 3                          |  |

|                                         |  |
|-----------------------------------------|--|
| Morphological description               |  |
| Region 4                                |  |
| Morphological description               |  |
| Region 5                                |  |
| Morphological description               |  |
| Region 6                                |  |
| Morphological description               |  |
| Region 7                                |  |
| Morphological description               |  |
| Region 8                                |  |
| Morphological description               |  |
| Region 9                                |  |
| Morphological description               |  |
| Region 10                               |  |
| Morphological description               |  |
| Region 11                               |  |
| Morphological description               |  |
| Region 12                               |  |
| Morphological description               |  |
| Evaluation of response                  |  |
| RECIST criteria                         |  |
| Any other(please specify)               |  |
| Progressive disease                     |  |
| Stable disease                          |  |
| Partial disease                         |  |
| Complete response                       |  |
| Nodal disease                           |  |
| Right pelvic nodes (disease/no disease) |  |
| Max diameter                            |  |
| Left pelvic nodes (D/ND)                |  |
| Max diameter                            |  |
| Paraortic nodes (D/ND)                  |  |
| Max diameter                            |  |
| Mesorectal nodes (D/ND)                 |  |
| Max diameter                            |  |
| Paracolic nodes (D/ND)                  |  |
| Max diameter                            |  |
| Small bowel nodes (D/ND)                |  |
| Max diameter                            |  |
| CBD/perportal (D/ND)                    |  |
| Max diameter                            |  |
| Left gastric nodes (D/ND)               |  |

|                                                 |  |
|-------------------------------------------------|--|
| Max diameter                                    |  |
| Peripancreatic nodes (D/ND)                     |  |
| Max diameter                                    |  |
| Supradiaphragmatic nodes (D/ND)                 |  |
| Max diameter                                    |  |
| Paracardiac (D/ND)                              |  |
| Max diameter                                    |  |
| Any other-specify (D/ND)                        |  |
| Max diameter                                    |  |
| Peritoneal nodes (D/ND)                         |  |
| Max diameter                                    |  |
| Ascites                                         |  |
| Ascites                                         |  |
| Quantity                                        |  |
| Characteristic                                  |  |
| Density (for mucinous ascites)                  |  |
| Primary tumor site                              |  |
| Primary tumor site (evaluated/not evaluated)    |  |
| Disease- present or absent                      |  |
| Response in the primary                         |  |
| Regional nodes                                  |  |
| Radiological T stage                            |  |
| Radiological N stage                            |  |
| Radiological M stage                            |  |
| Previous anastomosis (evaluated/not evaluated)  |  |
| Disease- present/absent                         |  |
| Stoma site- evaluated/not evaluated             |  |
| Disease- present/absent                         |  |
| PORT site- evaluated/not evaluated              |  |
| Disease-present/absent                          |  |
| Previous surgical scar- evaluated/not evaluated |  |
| Disease-present/absent                          |  |

## Section 3 Surgical and perioperative details

|                          |  |
|--------------------------|--|
| ASA                      |  |
| ECOG Status              |  |
| Date of CRS              |  |
| Resection of the primary |  |

|                             |  |
|-----------------------------|--|
| HIPEC                       |  |
| Open/closed                 |  |
| Drug regimen                |  |
| Duration                    |  |
| Surgical PCI                |  |
| Region 0                    |  |
| Morphological description   |  |
| Region 1                    |  |
| Morphological description   |  |
| Region 2                    |  |
| Morphological description   |  |
| Region 3                    |  |
| Morphological description   |  |
| Region 4                    |  |
| Morphological description   |  |
| Region 5                    |  |
| Morphological description   |  |
| Region 6                    |  |
| Morphological description   |  |
| Region 7                    |  |
| Morphological description   |  |
| Region 8                    |  |
| Morphological description   |  |
| Region 9                    |  |
| Morphological description   |  |
| Region 10                   |  |
| Morphological description   |  |
| Region 11                   |  |
| Morphological description   |  |
| Region 12                   |  |
| Morphological description   |  |
| Perioperative outcomes      |  |
| Duration of surgery         |  |
| Blood loss                  |  |
| Post op ventilation (hours) |  |
| ICU stay                    |  |
| Hospital stay               |  |
| Grade 1-2 complications     |  |
| 90-day grade 3-4 morbidity  |  |
| Haemorrhage                 |  |
| Specify                     |  |
| Hematological toxicity      |  |

|                                |  |
|--------------------------------|--|
| Specify                        |  |
| Respiratory complications      |  |
| Specify                        |  |
| Sepsis                         |  |
| Specify                        |  |
| Neutropenia                    |  |
| Lowest count                   |  |
| Cardiac complications          |  |
| Specify                        |  |
| GI complications               |  |
| Specify                        |  |
| Bowel fistula                  |  |
| Specify                        |  |
| Bowel perforation              |  |
| Specify site                   |  |
| Renal complication             |  |
| Specify                        |  |
| Nephrological complications    |  |
| Specify                        |  |
| Wound dehiscence               |  |
| Site                           |  |
| Surgical site infection        |  |
| Return to ICU                  |  |
| Duration of stay               |  |
| Return to operating room       |  |
| Procedure performed/indication |  |
| Radiological intervention      |  |
| Specify                        |  |
| Mortality                      |  |
| Date of death                  |  |
| Cause of death                 |  |

## Section 4 Pathology

|                           |  |
|---------------------------|--|
| No of specimens           |  |
| No of blocks              |  |
| Pathological PCI          |  |
| Region 0                  |  |
| Morphological description |  |
| Region 1                  |  |
| Morphological description |  |
| Region 2                  |  |
| Morphological description |  |

|                                              |  |
|----------------------------------------------|--|
| Region 3                                     |  |
| Morphological description                    |  |
| Region 4                                     |  |
| Morphological description                    |  |
| Region 5                                     |  |
| Morphological description                    |  |
| Region 6                                     |  |
| Morphological description                    |  |
| Region 7                                     |  |
| Morphological description                    |  |
| Region 8                                     |  |
| Morphological description                    |  |
| Region 9                                     |  |
| Morphological description                    |  |
| Region 10                                    |  |
| Morphological description                    |  |
| Region 11                                    |  |
| Morphological description                    |  |
| Region 12                                    |  |
| Morphological description                    |  |
| Nodal disease                                |  |
| Right pelvic nodes (dissected/not dissected) |  |
| No of nodes                                  |  |
| No of positive nodes                         |  |
| Left pelvic nodes (D/ND)                     |  |
| No of nodes                                  |  |
| No of positive nodes                         |  |
| Paraaortic nodes (D/ND)                      |  |
| No of nodes                                  |  |
| No of positive nodes                         |  |
| Mesorectal nodes (D/ND)                      |  |
| No of nodes                                  |  |
| No of positive nodes                         |  |
| Paracolic nodes (D/ND)                       |  |
| No of nodes                                  |  |
| No of positive nodes                         |  |
| Small bowel nodes (D/ND)                     |  |
| No of nodes                                  |  |
| No of positive nodes                         |  |
| CBD/periportal (D/ND)                        |  |
| No of nodes                                  |  |
| No of positive nodes                         |  |
| Left gastric nodes (D/ND)                    |  |
| No of nodes                                  |  |

|                                                |  |
|------------------------------------------------|--|
| No of positive nodes                           |  |
| Peripancreatic nodes (D/ND)                    |  |
| No of nodes                                    |  |
| No of positive nodes                           |  |
| Supradiaphragmatic nodes (D/ND)                |  |
| No of nodes                                    |  |
| No of positive nodes                           |  |
| Paracardiac (D/ND)                             |  |
| No of nodes                                    |  |
| No of positive nodes                           |  |
| Any other-specify (D/ND)                       |  |
| No of nodes                                    |  |
| No of positive nodes                           |  |
| Peritoneal nodes (D/ND)                        |  |
| No of nodes                                    |  |
| No of positive nodes                           |  |
| Greater omental nodes                          |  |
| No of nodes                                    |  |
| No of positive nodes                           |  |
| Lesser omental nodes                           |  |
| No of nodes                                    |  |
| No of positive nodes                           |  |
| Total no of nodes                              |  |
| Total no of positive nodes                     |  |
| Pathological response to systemic chemotherapy |  |
| Bohm score(for ovarian cancer)                 |  |
| Response grade                                 |  |
| PRGS                                           |  |
| Response grade                                 |  |
| Lyon-score for colorectal PM                   |  |
| Overall score                                  |  |
| Fibrosis (%)                                   |  |
| Necrosis (%)                                   |  |
| Colloid response (%)                           |  |
| Any other score used                           |  |
| Grade                                          |  |
| Additional comments                            |  |
| Pathological complete response (y/n)           |  |
| Sites of complete response (present/absent)    |  |
| Evaluation of the primary tumour               |  |
| Disease in the primary                         |  |
| Maximum tumour diameter                        |  |



|                                                   |  |
|---------------------------------------------------|--|
| T-stage                                           |  |
| N-stage                                           |  |
| No of dissected nodes                             |  |
| No of positive nodes                              |  |
| Extracapsular spread                              |  |
| Lymphovascular invasion                           |  |
| Perineural invasion                               |  |
| Immunohistochemistry-positive markers             |  |
| Immunohistochemistry-negative markers             |  |
| Target regions and normal peritoneum              |  |
| Disease in normal peritoneum                      |  |
| Falciform ligament (resected/not resected)        |  |
| Max tumour diameter on gross examination (mm)     |  |
| Microscopic disease (present/absent)              |  |
| Umbilical round ligament (resected/not resected)  |  |
| Max tumour diameter on gross examination (mm)     |  |
| Microscopic disease (present/absent)              |  |
| Greater omentum (resected/not resected)           |  |
| Max tumour diameter on gross examination (mm)     |  |
| Microscopic disease (present/absent)              |  |
| Lesser omentum (resected/not resected)            |  |
| Max tumour diameter on gross examination (mm)     |  |
| Microscopic disease (present/absent)              |  |
| Pancreatic capsule (resected/not resected)        |  |
| Max tumour diameter on gross examination (mm)     |  |
| Microscopic disease (present/absent)              |  |
| Viscera                                           |  |
| Glisson's (resected/not resected)                 |  |
| Max tumour diameter on gross examination (mm)     |  |
| Microscopic disease (present/absent)              |  |
| Rectum/rectosigmoid colon (resected/not resected) |  |
| Max tumour diameter on gross examination (mm)     |  |
| Microscopic disease (present/absent)              |  |
| Right colon (resected/not resected)               |  |
| Max tumour diameter on gross examination (mm)     |  |
| Microscopic disease (present/absent)              |  |
| Gall bladder (resected/not resected)              |  |
| Max tumour diameter on gross examination (mm)     |  |
| Microscopic disease (present/absent)              |  |
| Spleen (resected/not resected)                    |  |
| Max tumour diameter on gross examination (mm)     |  |
| Microscopic disease (present/absent)              |  |

|                                                     |  |
|-----------------------------------------------------|--|
| Stomach (resected/not resected)                     |  |
| Max tumour diameter on gross examination (mm)       |  |
| Microscopic disease (present/absent)                |  |
| Small bowel (resected/not resected)                 |  |
| Max tumour diameter on gross examination (mm)       |  |
| Microscopic disease (present/absent)                |  |
| Liver (resected/not resected)                       |  |
| Max tumour diameter on gross examination (mm)       |  |
| Microscopic disease (present/absent)                |  |
| Intraparenchymal metastases (resected/not resected) |  |
| Max tumour diameter on gross examination (mm)       |  |
| Microscopic disease (present/absent)                |  |
| Previous anastomotic site (resected/not resected)   |  |
| Max tumour diameter on gross examination (mm)       |  |
| Microscopic disease (present/absent)                |  |
| Previous stoma site (resected/not resected)         |  |
| Max tumour diameter on gross examination (mm)       |  |
| Microscopic disease (present/absent)                |  |
| PORT SITE (resected/not resected)                   |  |
| Max tumour diameter on gross examination (mm)       |  |
| Microscopic disease (present/absent)                |  |
| Previous surgical scar (resected/not resected)      |  |
| Max tumour diameter on gross examination (mm)       |  |
| Microscopic disease (present/absent)                |  |

## Section 5 Adjuvant therapy and follow up

|                                   |  |
|-----------------------------------|--|
| Adjuvant therapy                  |  |
| Adjuvant therapy planned          |  |
| Date of start of adjuvant therapy |  |
| Chemotherapy regimen              |  |
| Number of cycles                  |  |
| Targetted therapy                 |  |
| Drug                              |  |
| Number of cycles                  |  |
| Date of last cycle                |  |
| Maintenance therapy               |  |
| Drug                              |  |
| Duration                          |  |
| Follow-up                         |  |
| Last follow-up                    |  |

|                                             |  |
|---------------------------------------------|--|
| Disease status                              |  |
| Date of diagnosis of recurrence             |  |
| Site of recurrence                          |  |
| Site of metastases                          |  |
| Treatment for recurrence/metastatic disease |  |
| Date of death                               |  |
| Cause of death                              |  |
